# Supplementary material
Source: MDPI journal article supplement (https://www.mdpi.com/2673-8023/2/1/4)
Supplement: s1 [file s1]

# Active Textile Glove for Cooling and Personal Protection

Xiaoda Hou <sup>1,2</sup>, Travis Neuendorf <sup>1</sup>, David Mast <sup>3</sup>, Ashley Kubley <sup>4</sup>, Vianessa Ng <sup>1,2</sup> and Mark Schulz <sup>1,2,\*</sup>

<sup>1</sup> College of Engineering and Applied Sciences, University of Cincinnati, Cincinnati, OH 45221, USA; houxad@gmail.com (X.H.), neuendtc@mail.uc.edu (T.N.), ngva@mail.uc.edu (V.N.)

<sup>2</sup> Nanoworld Laboratories, University of Cincinnati, Cincinnati, OH 45221, USA

<sup>3</sup> Department of Physics, University of Cincinnati, Cincinnati, OH 45221, USA; mastdb@ucmail.uc.edu

<sup>4</sup> College of Design, Architecture, Art, and Planning, University of Cincinnati, Cincinnati, OH 45221, USA; kubleyay@ucmail.uc.edu

\* Correspondence: schulzmk@ucmail.uc.edu

## Supplementary Description of The Analysis Equations

Refer to Figure 1. In this heat transfer model system, the glove is simulated based on thermal conduction and convection. The glove is separated into two parts, one is the upper side, and another is the lower side. The equations and theory of heat transfer on both sides are the same. The heat transfer by conduction through the glove equals that of the CNT sheet layer, so:

$$q_{g1} = q_{CNT1} \quad (1)$$

The heat transfer rate by conduction of the upper layer of the glove is:

$$q_{g1} = P_g \times (T_1 - T_3) \quad (2)$$

where  $P_g$  is  $\frac{KA}{L}$ , and K is the thermal conductivity of the glove, A is the surface area of the glove, L is the thickness of the glove material. T1 is the environmental temperature and T3 is the temperature between the glove layer and the CNT sheet layer.

The heat transfer rate by conduction of the CNT fabric is:

$$q_{CNT1} = q_{ch1} + q_{cp1} \quad (3)$$

where  $q_{ch1}$  is the heat transfer rate by conduction of the CNT fabric to the hand and the direction is vertical (through the thickness), and  $q_{cp1}$  is the heat transfer rate by conduction of the CNT fabric to the convection area, whose direction is transferred in the plane of the fabric. The convection area has a specific temperature.

Here,  $P_{cp}$  is  $\frac{KA_c}{L}$ , and K is thermal conductivity of CNT fabric to convection area (thermal conductivity of CNT fabric in the plane of the fabric direction),  $A_c$  is the cross-sectional area of the CNT fabric, L is the length of the CNT sheet or fabric to convection area. Also, T7 is the temperature between the CNT sheet and convection model, and T5 is the temperature between the CNT sheet and hand.

The heat transfer rate by convection is:

$$q_{convection1} = P_{conv} \times (T_7 - T_9) \quad (4)$$

where  $P_{conv}$  is  $\widetilde{hc} \times A$ , and  $\widetilde{hc}$  is the average convection heat transfer coefficient over the surface area A, and A is the area of convection model. T9 is the temperature at the end of the thermal convection model, which is set at 40 degrees Celsius.

Equation 5 represents the heat transfer rate by conduction from the CNT sheet or fabric to the convection area.

$$q_{cp1} = P_{cp} \times (T_7 - \frac{T_3 + T_5}{2}) \quad (5)$$

The heat transfer rate by conduction from the CNT sheet layer to the hand is:

$$q_{ch1} = P_{ch} \times (T_3 - T_5) \quad (6)$$

where  $P_{ch}$  is  $\frac{KA}{L}$ , and K is the thermal conductivity of the CNT sheet to the hand, A is the surface area of the CNT sheet, L is the length of the CNT sheet to the hand.

The heat transfer rate by conduction of the hand on the upper side is:

$$q_{h1} = P_h \times (T_5 - T_{11}) \quad (7)$$

where  $P_h$  is  $\frac{KA}{L}$ , and K is the thermal conductivity of the hand, A is the surface area of hand, L is half of the thickness of hand. T11 is temperature at the center of the hand.

The heat transfer rate based on conduction of the hand to the arm is:

$$q_{ha} = P_{ha} \times (T_{11} - T_{12}) \quad (8)$$

where  $P_{ha}$  is  $\frac{KA_c}{L}$ , and K is the thermal conductivity of the hand to the arm,  $A_c$  is the cross-sectional area of the hand, L is half of the length of hand. T12 is temperature between the hand and the arm.

The heat transfer rate based on conduction of the arm is:

$$q_a = P_a \times (T_{12} - T_{13}) \quad (9)$$

These are all the equations to model the upper side of the glove. Next are the equations to model the lower side of glove. The heat transfer based on conduction of glove equals that of the CNT sheet layer, so:

$$q_{g2} = q_{CNT2} \quad (10)$$

The heat transfer rate by conduction of the lower side of the glove is:

$$q_{g2} = P_g \times (T_2 - T_4) \quad (11)$$

where T2 is the environment temperature and T4 is the temperature between the glove layer and CNT sheet layer.

The heat transfer rate based on conduction of the CNT sheet is:

$$q_{CNT2} = q_{ch2} + q_{cp2} \quad (12)$$

where  $q_{ch2}$  is the heat transfer rate by conduction of the CNT sheet to the hand and the direction is vertical (through the thickness), and  $q_{cp2}$  is the heat transfer rate by conduction of CNT sheet to the convection model, whose direction is horizontal (in the plane of the fabric).

$$q_{cp2} = P_{cp} \times (T_8 - \frac{T_4 + T_6}{2}) \quad (13)$$

where T8 is temperature between the CNT sheet and the convection area, and T6 is temperature between the CNT sheet and the hand.

The heat transfer rate based on convection is:

$$q_{convection2} = P_{conv} \times (T_8 - T_{10}) \quad (14)$$

Here T10 is the temperature at the end of the convection model, which is set at 40 Celsius degrees.

The heat transfer rate by conduction from the CNT sheet layer to the hand is:

$$q_{ch2} = P_{ch} \times (T_4 - T_6) \quad (15)$$

The heat transfer rate by conduction of the hand on the lower side is:

$$q_{h2} = P_h \times (T_6 - T_{11}) \quad (16)$$

The heat transfer rate by conduction of the hand to the arm also equals:

$$q_{ha} = q_{h1} + q_{h2} \quad (17)$$

$$q_{ha} = q_a \quad (18)$$

At the same time,

$$q_{h1} = q_{ch1} \quad (19)$$

$$q_{h2} = q_{ch2} \quad (20)$$

$$q_{cp1} = q_{conv1} \quad (21)$$

$$q_{cp2} = q_{conv2} \quad (22)$$

Then, the 22 equations can be transferred into a matrix, so that it can be solved simultaneously in MATLAB.

**Parameter values used in the glove simulation model.**

| Parameter Name                                                                                    | Parameter Symbol | Parameter Value   | Parameter Unit |
|---------------------------------------------------------------------------------------------------|------------------|-------------------|----------------|
| Thermal conductivity of outer layer of glove                                                      | K_glove          | 0.05              | W/(m·K)        |
| Area of outer layer of glove                                                                      | A_glove          | 0.03              | m <sup>2</sup> |
| Length of outer layer of glove                                                                    | L_glove          | 0.01              | m              |
| Thermal conductivity of the CNT sheet from CNT sheet to convection model (in the plane direction) | K_cp_convection  | 200               | W/(m·K)        |
| Area of the place from CNT to convection model                                                    | A_cp_convection  | 0.003             | m <sup>2</sup> |
| Length from the CNT to convection model                                                           | L_cp_convection  | 0.15              | m              |
| Heat conductivity of the place from CNT to hand                                                   | K_ch_CNTtoHand   | 2                 | W/(m·K)        |
| Area of CNT sheet from CNT to hand                                                                | A_ch_CNTtoHand   | 0.0225            | m <sup>2</sup> |
| Length from the CNT to hand                                                                       | L_ch_CNTtoHand   | 0.001             | m              |
| Heat conductivity of the place from hand to arm                                                   | K_ha_HandtoArm   | 2                 | W/(m·K)        |
| Area of the place from hand to arm                                                                | A_ha_HandtoArm   | 0.00225           | m <sup>2</sup> |
| Length from hand to arm                                                                           | L_ha_HandtoArm   | 0.1               | m              |
| Heat conductivity of arm                                                                          | K_a_Arm          | 2                 | W/(m·K)        |
| Area of arm                                                                                       | A_a_Arm          | 0.004             | m <sup>2</sup> |
| Length of arm                                                                                     | L_a_Arm          | 0.03              | m              |
| Heat conductivity of hand                                                                         | K_h_Hand         | 2                 | W/(m·K)        |
| Area of hand                                                                                      | A_h_Hand         | 0.03              | m <sup>2</sup> |
| Length of hand                                                                                    | L_h_Hand         | 0.0075            | m              |
| Environment temperature                                                                           | T1 and T2        | Changing by cases | K              |
| Temperature at the end of phase change material                                                   | T9               | 313.15            | K              |
| Temperature at the end of the arm                                                                 | T13              | 310.15            | K              |
